# Supplementary material for: The Elucidation of the Interactome of 16 Arabidopsis bZIP Factors Reveals Three Independent Functional Networks
Source: PubMed Central journal article supplement (PMC4599898; doi:10.1371/journal.pone.0139884), 2015-10-09

A)

Dataset: 7 anatomical parts (sample selection: AT-SAMPLES-plant parts)

8 genes (gene selection: AT-GENES-0)

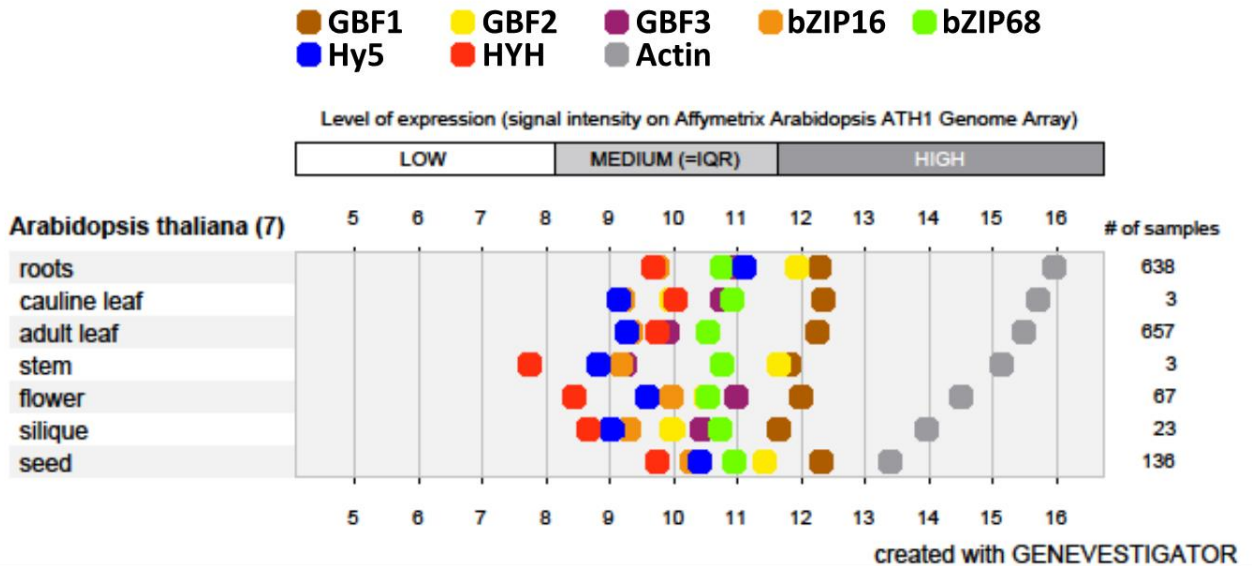

Dataset: 7 anatomical parts (sample selection: AT-SAMPLES-plant parts)

10 genes (gene selection: AT-GENES-0)

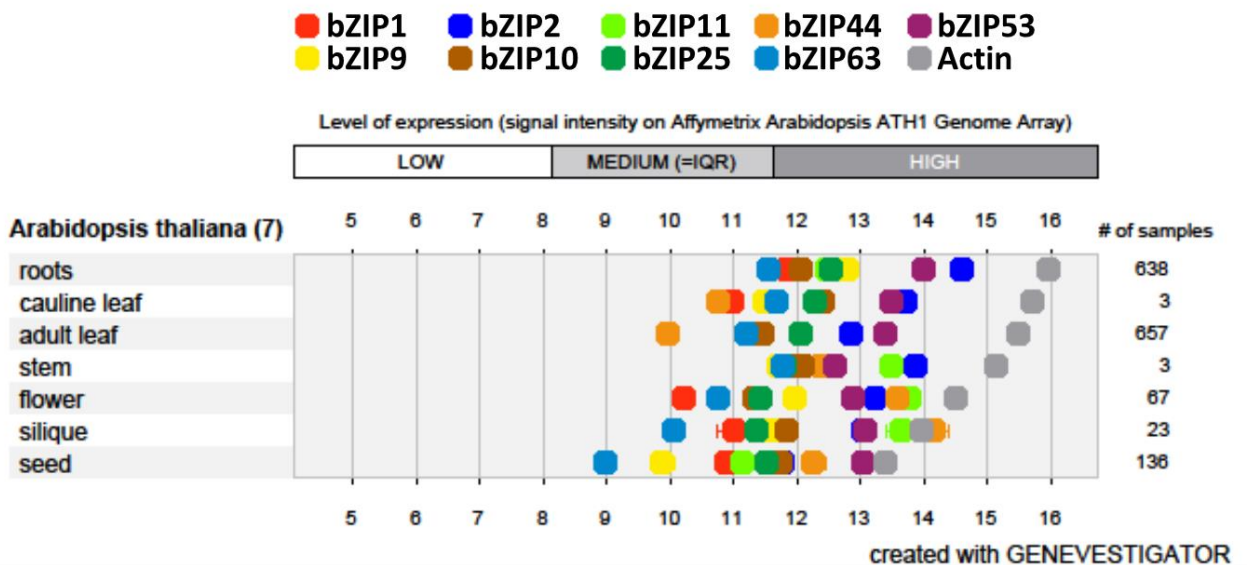

## B)

Dataset: 10 developmental stages (sample selection: AT-SAMPLES-plant parts)  
8 genes (gene selection: AT-GENES-0)

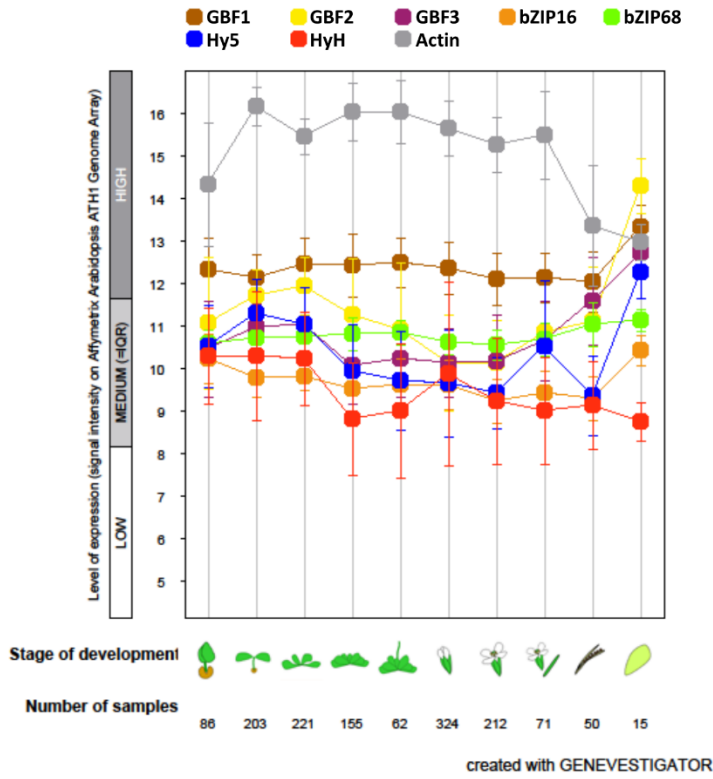

Dataset: 10 developmental stages (sample selection: AT-SAMPLES-plant parts)  
10 genes (gene selection: AT-GENES-0)

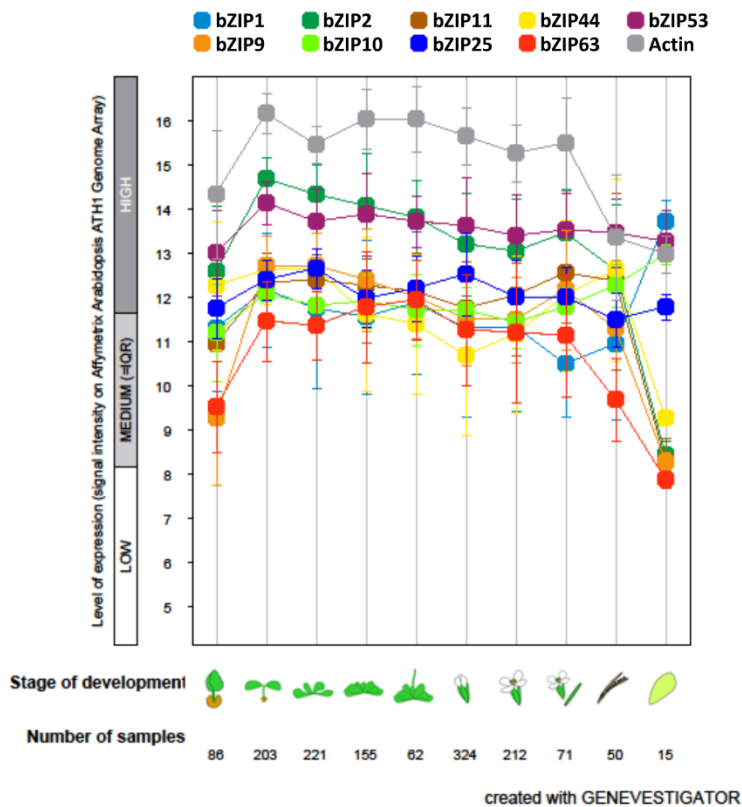

C)

## Actin

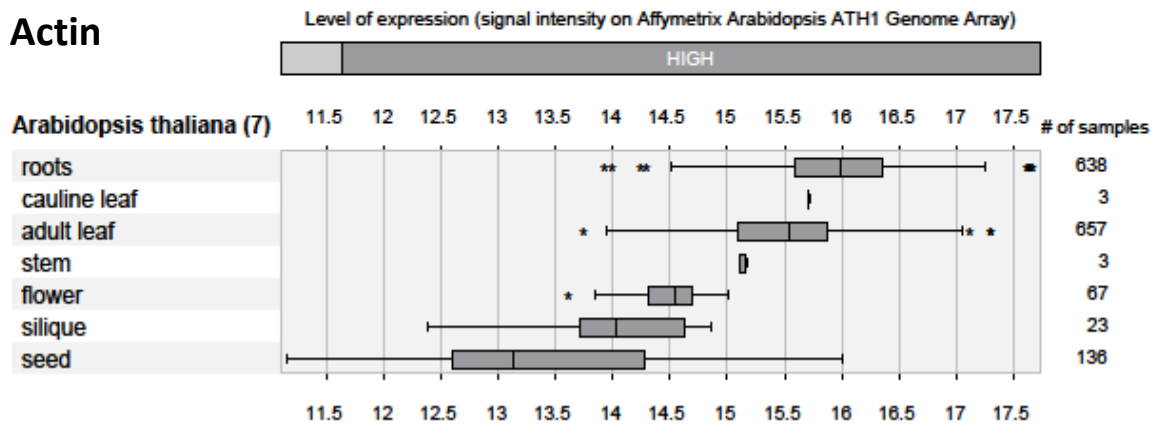

## bZIP1

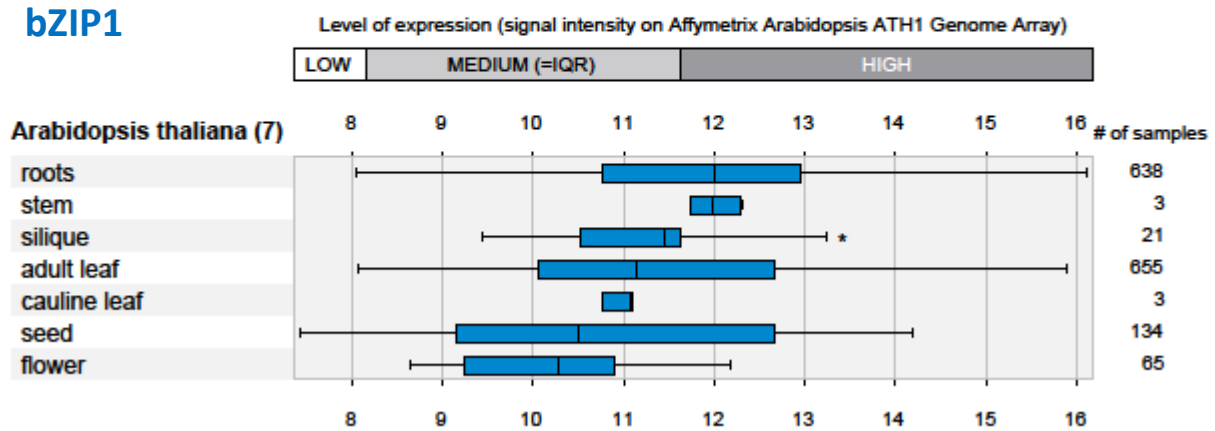

## bZIP2

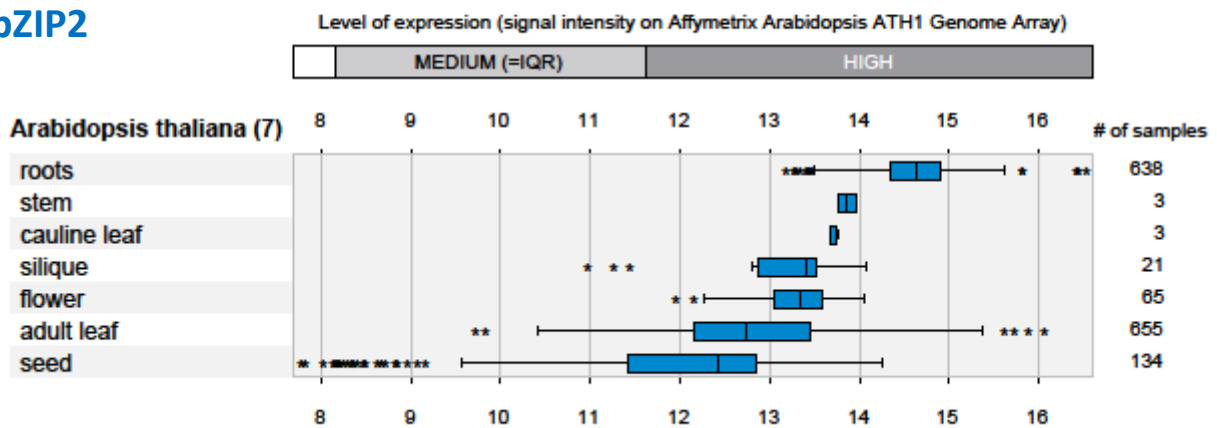

## bZIP11

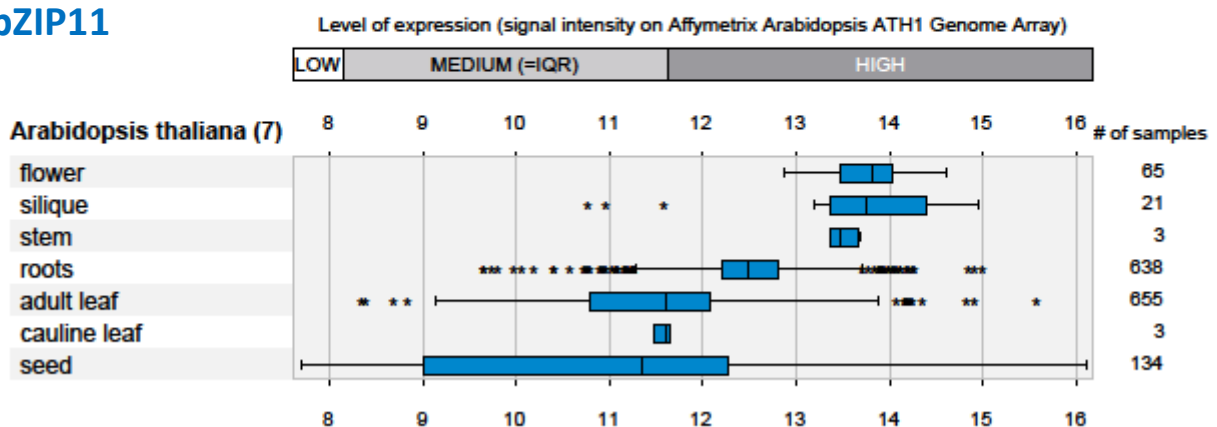

## bZIP44

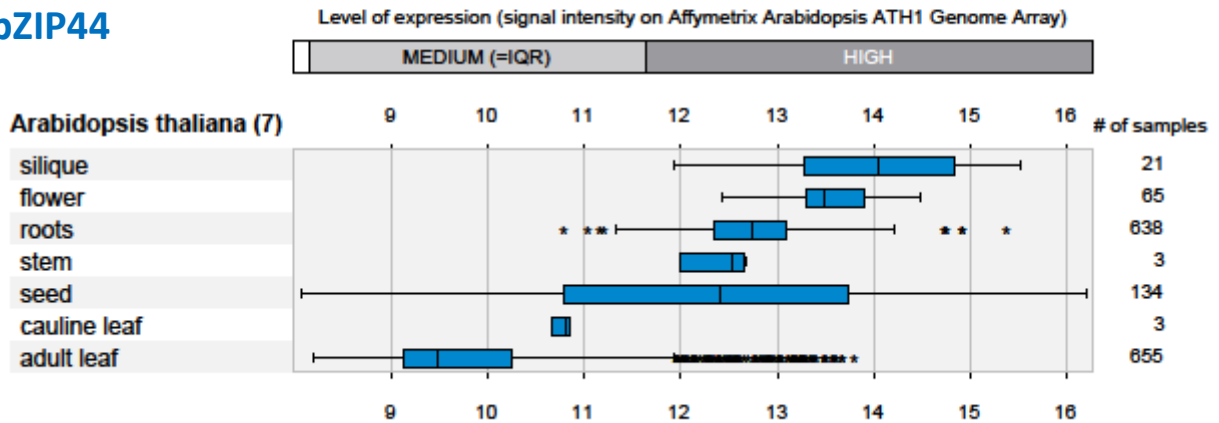

## bZIP53

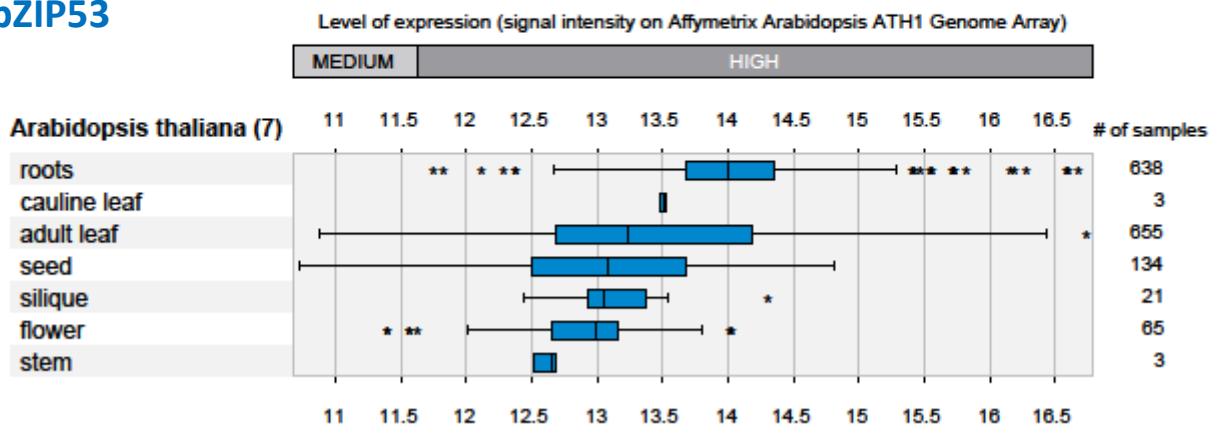

## bZIP9

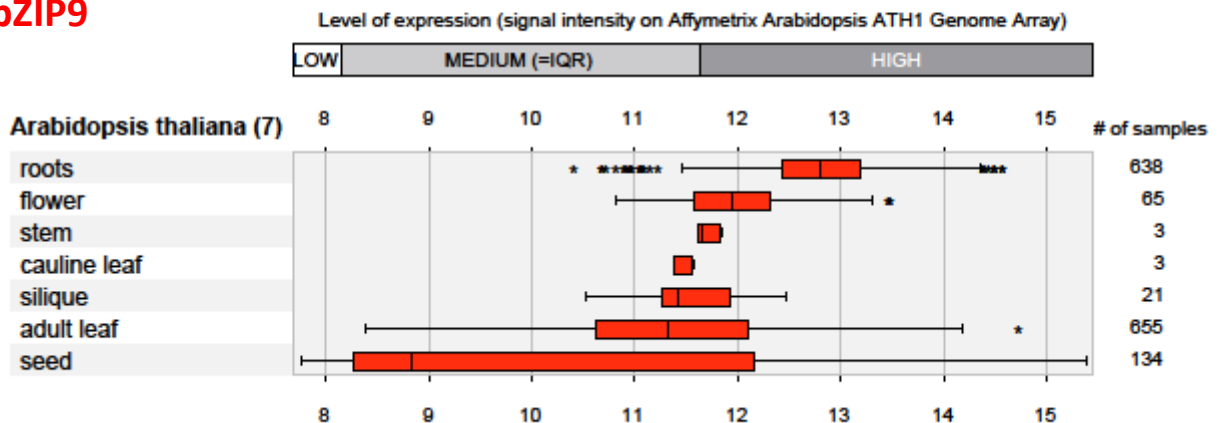

## bZIP10

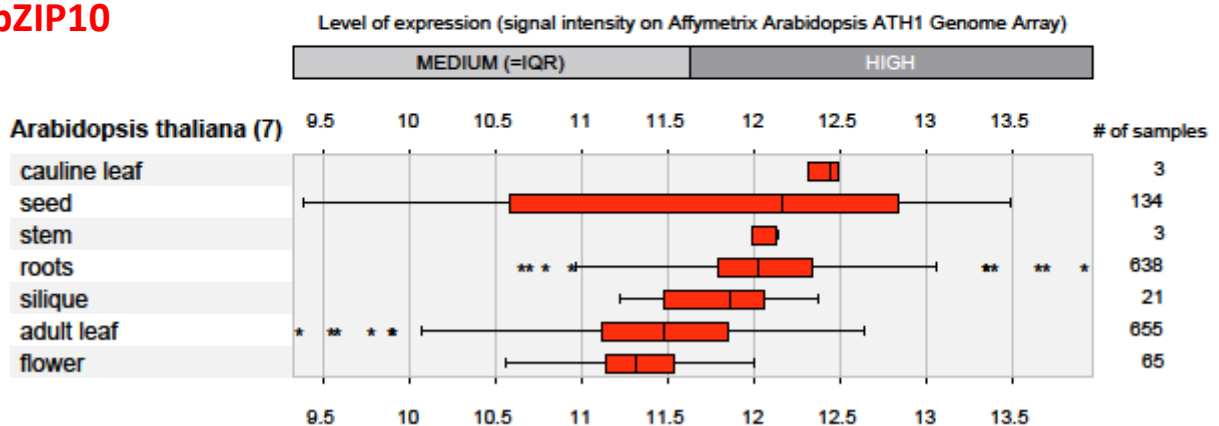

## bZIP25

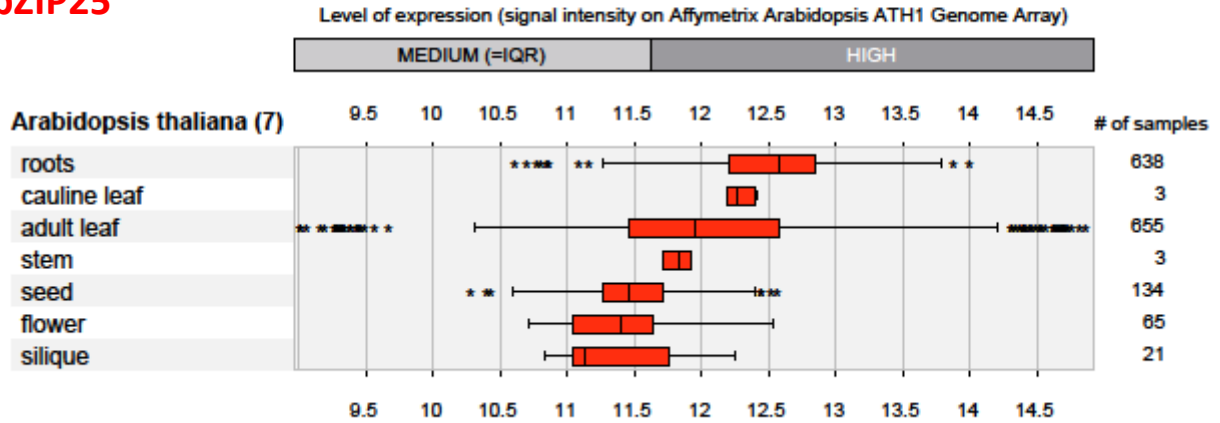

## bZIP63

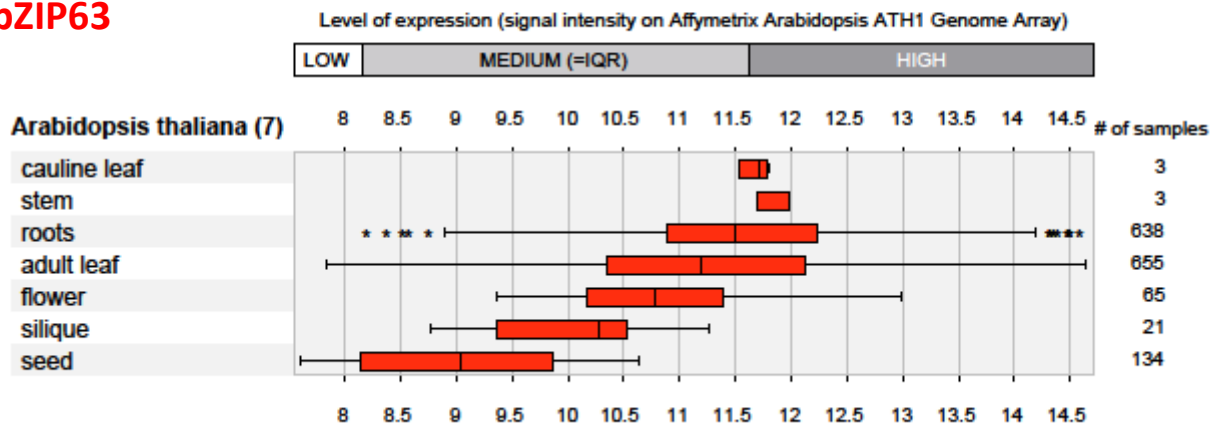

## GBF1

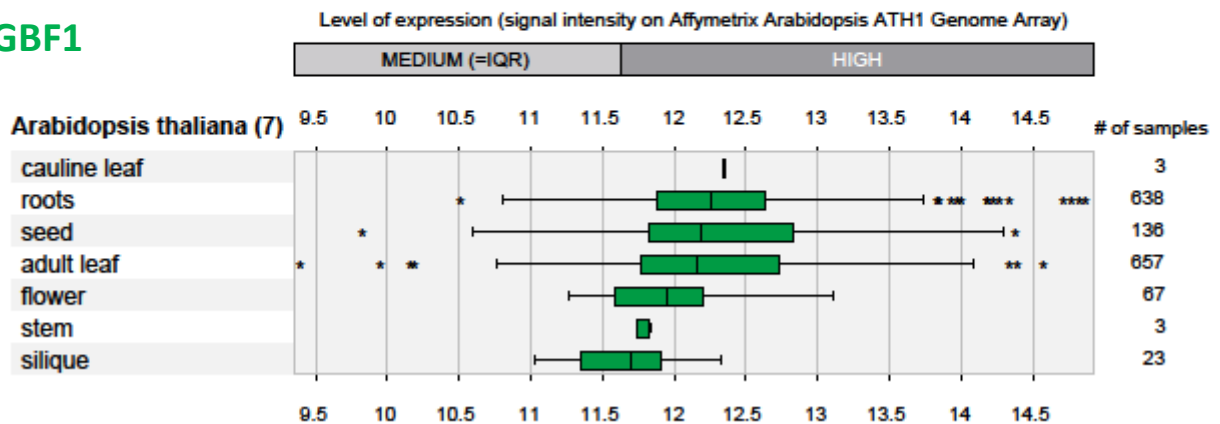

## GBF2

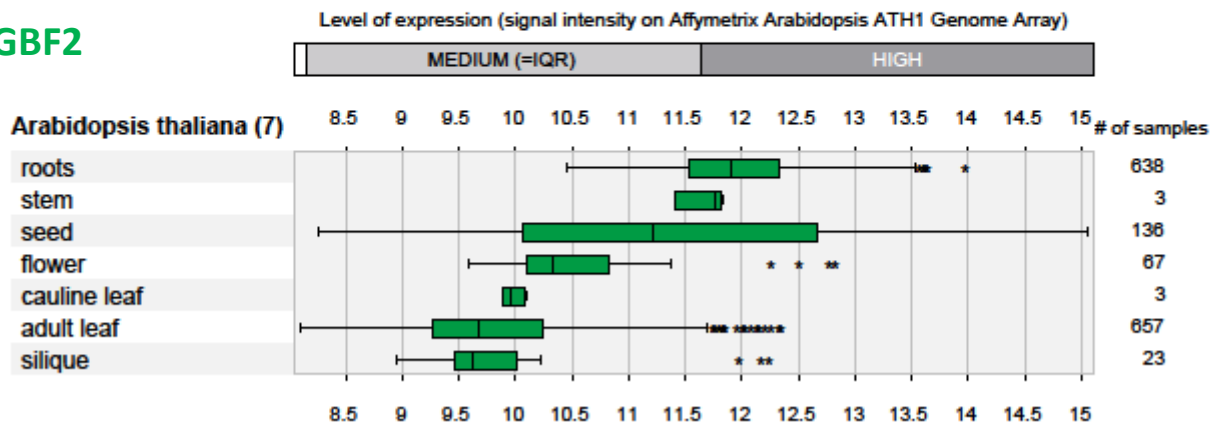

## GBF3

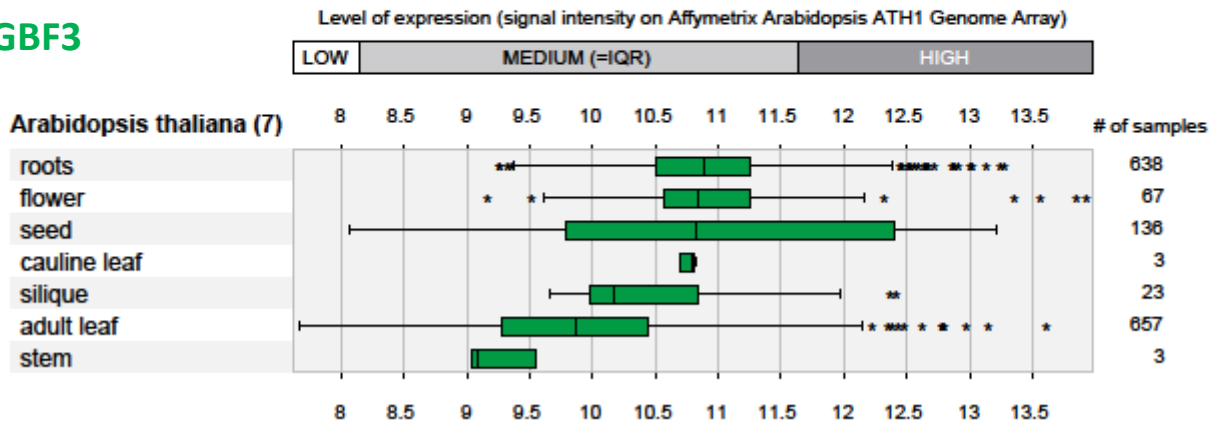

## bZIP16

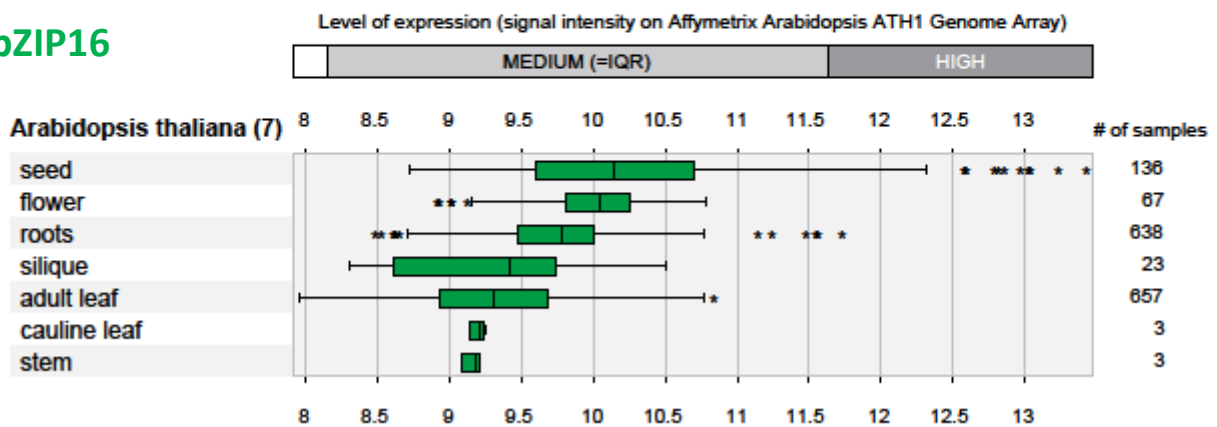

## bZIP68

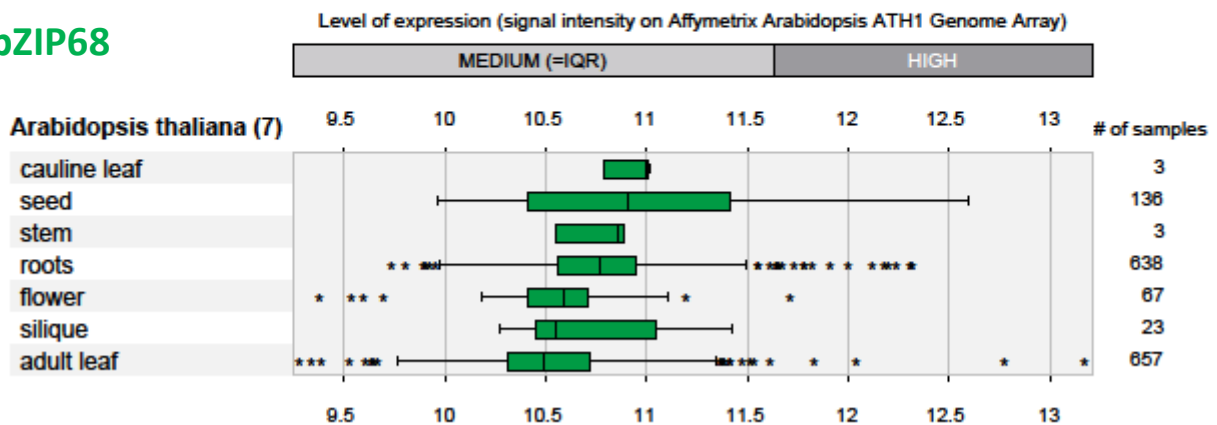

## Hy5

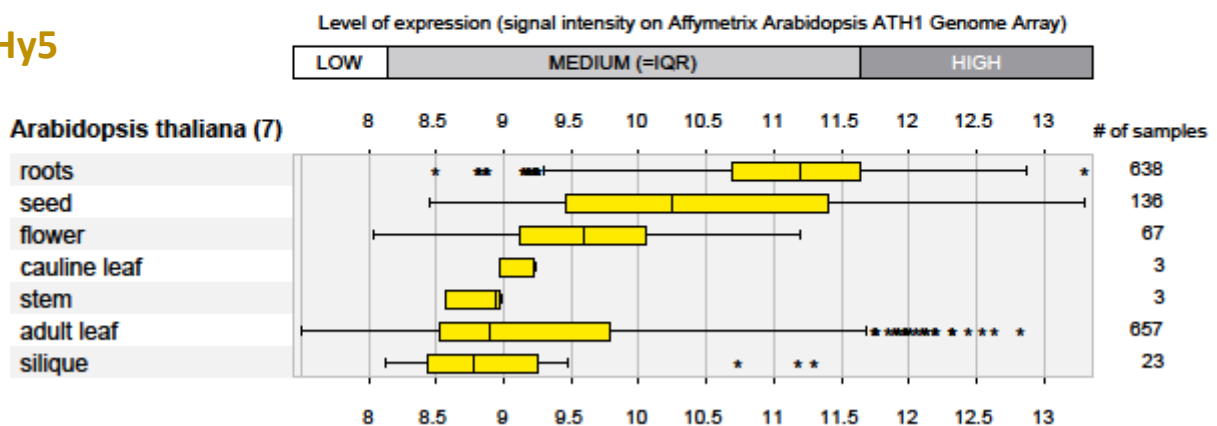

# HyH

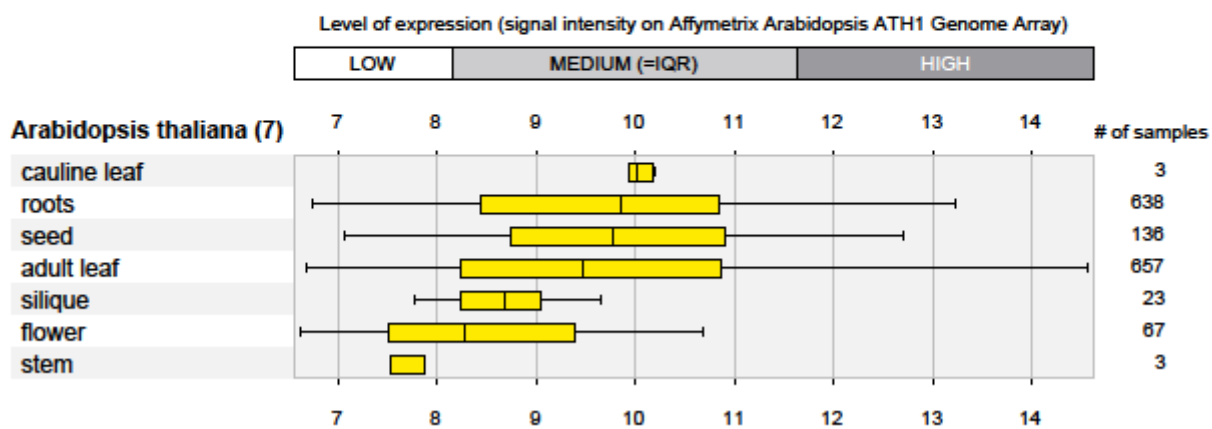

Supplement: pone.0139884.s004.pdf [file pone.0139884.s004.pdf]
