# Supplementary material for: The Elucidation of the Interactome of 16 Arabidopsis bZIP Factors Reveals Three Independent Functional Networks
Source: PubMed Central journal article supplement (PMC4599898; doi:10.1371/journal.pone.0139884), 2015-10-09

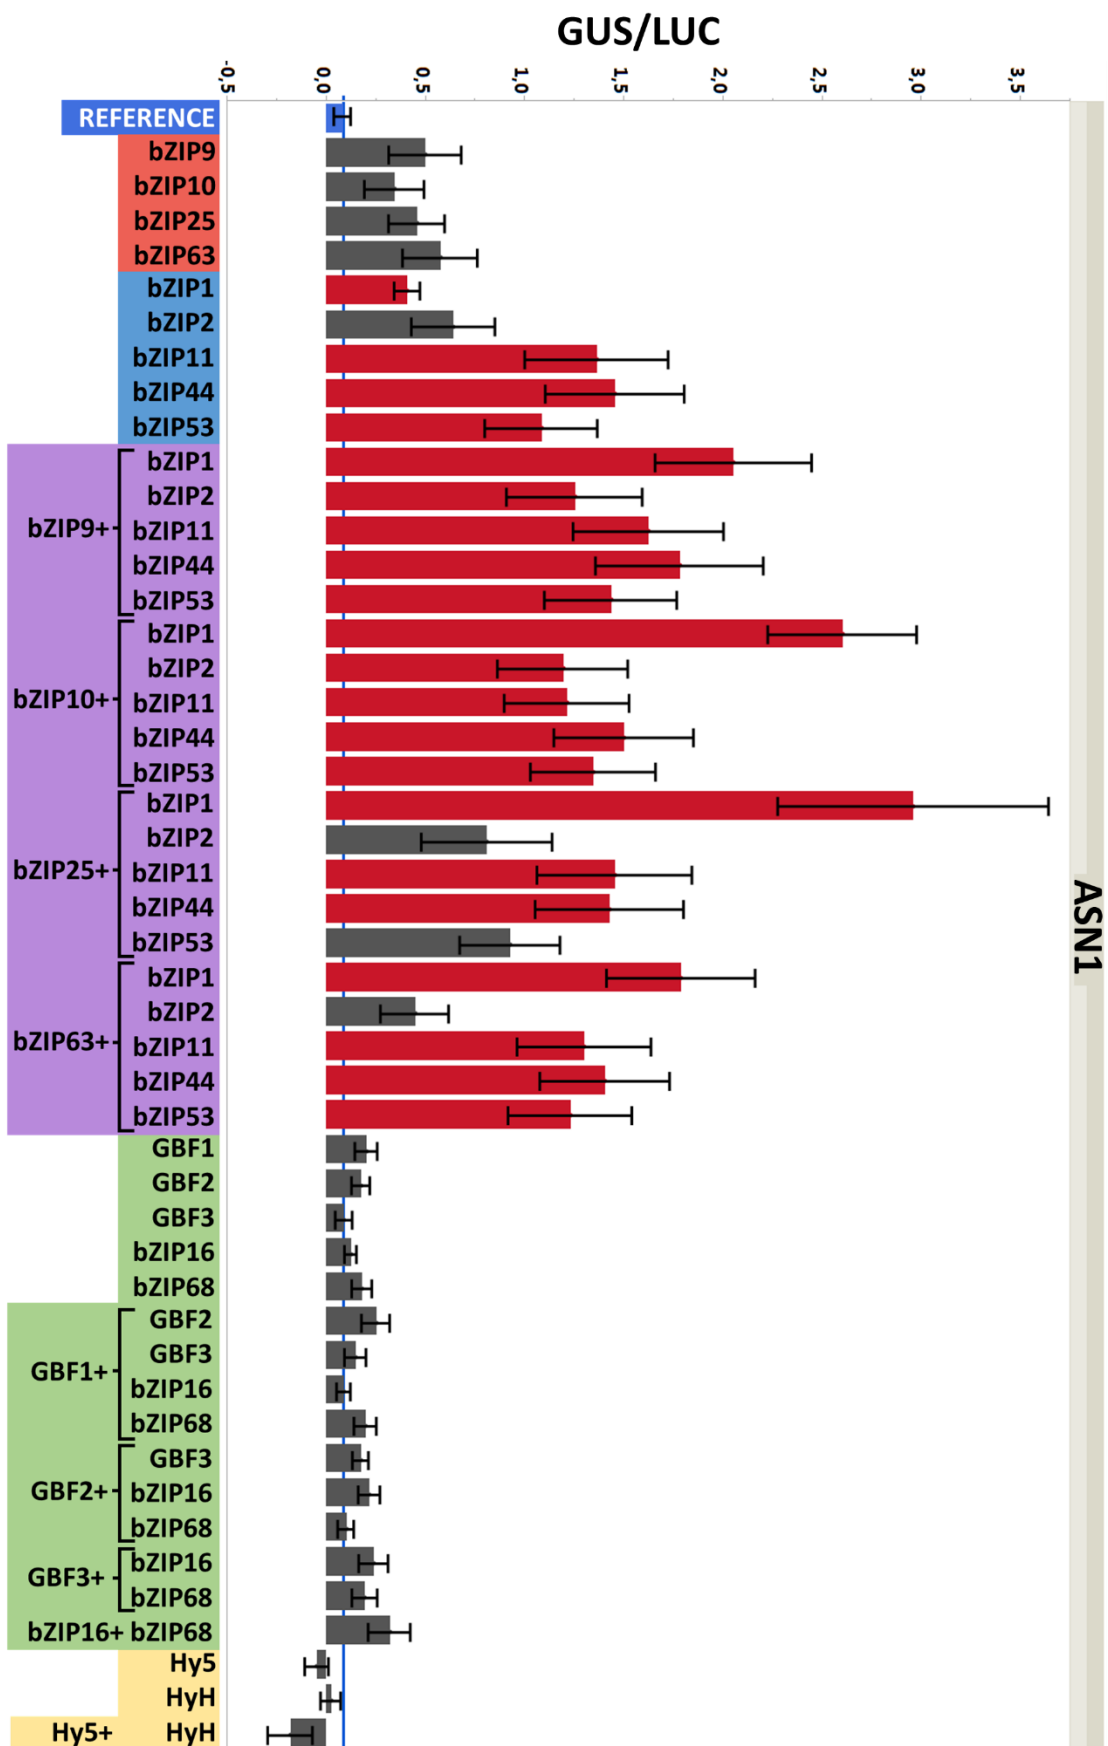

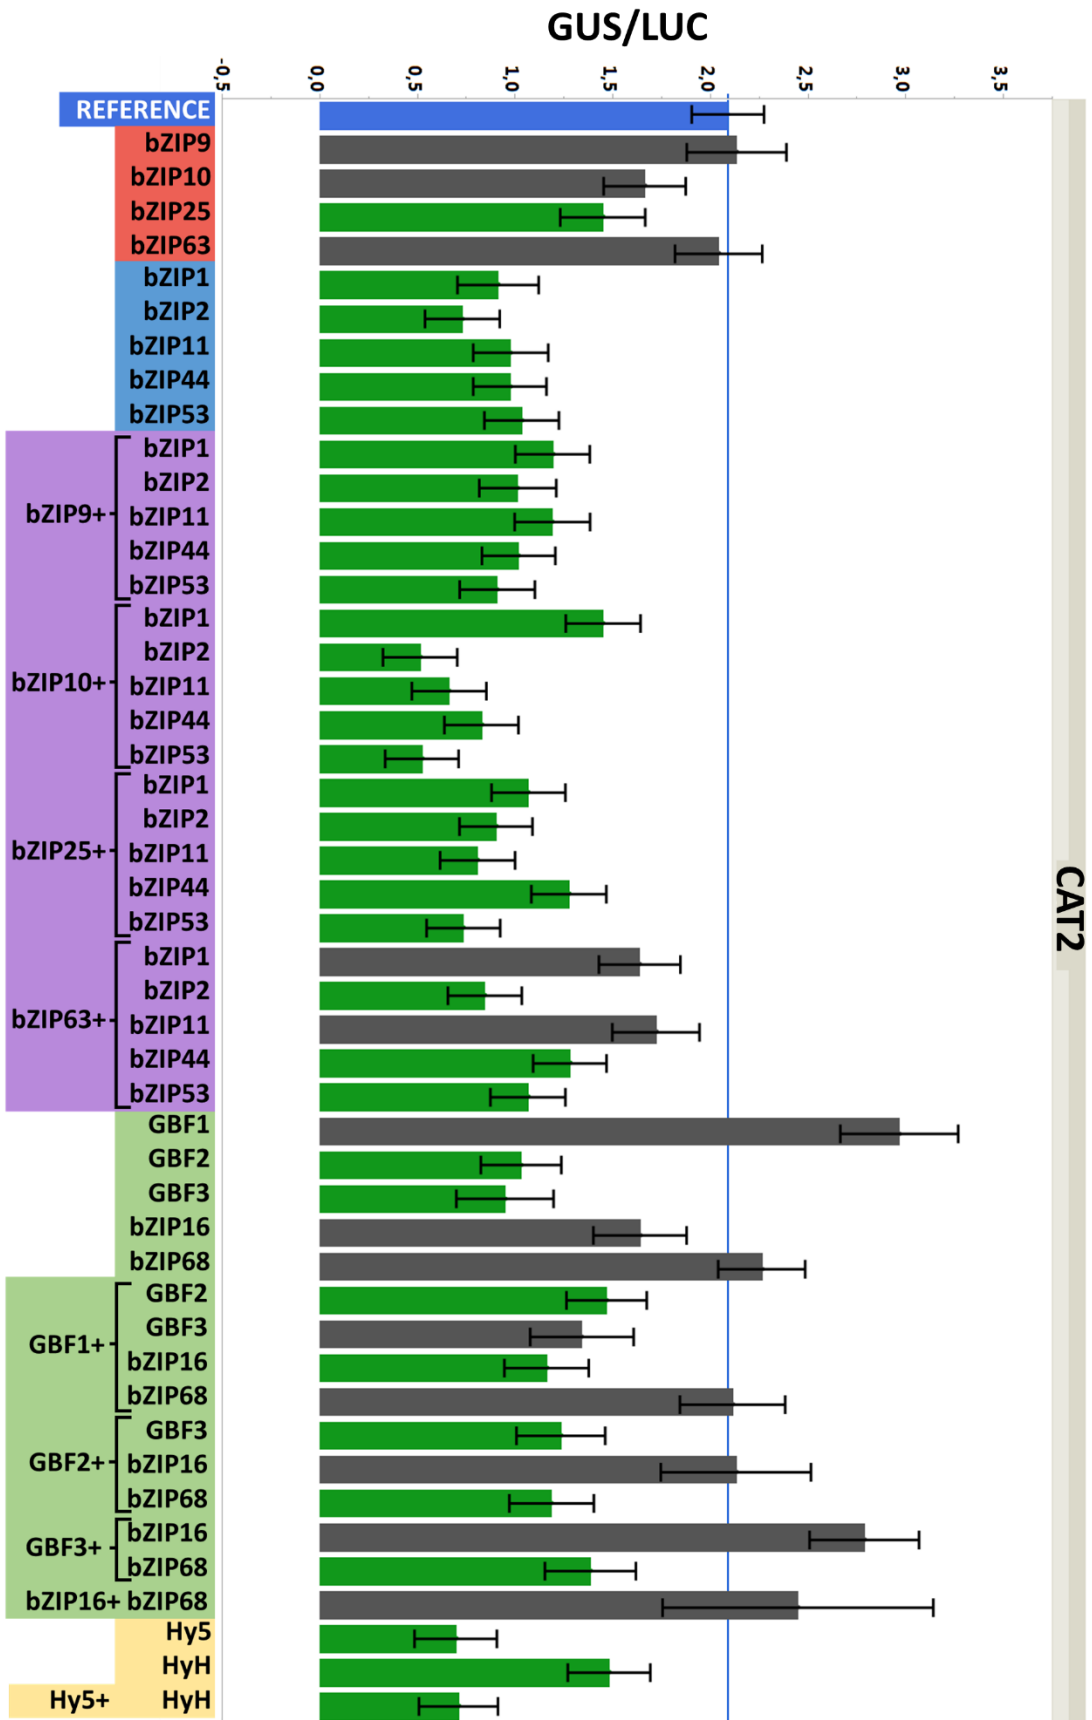

# GUS/LUC

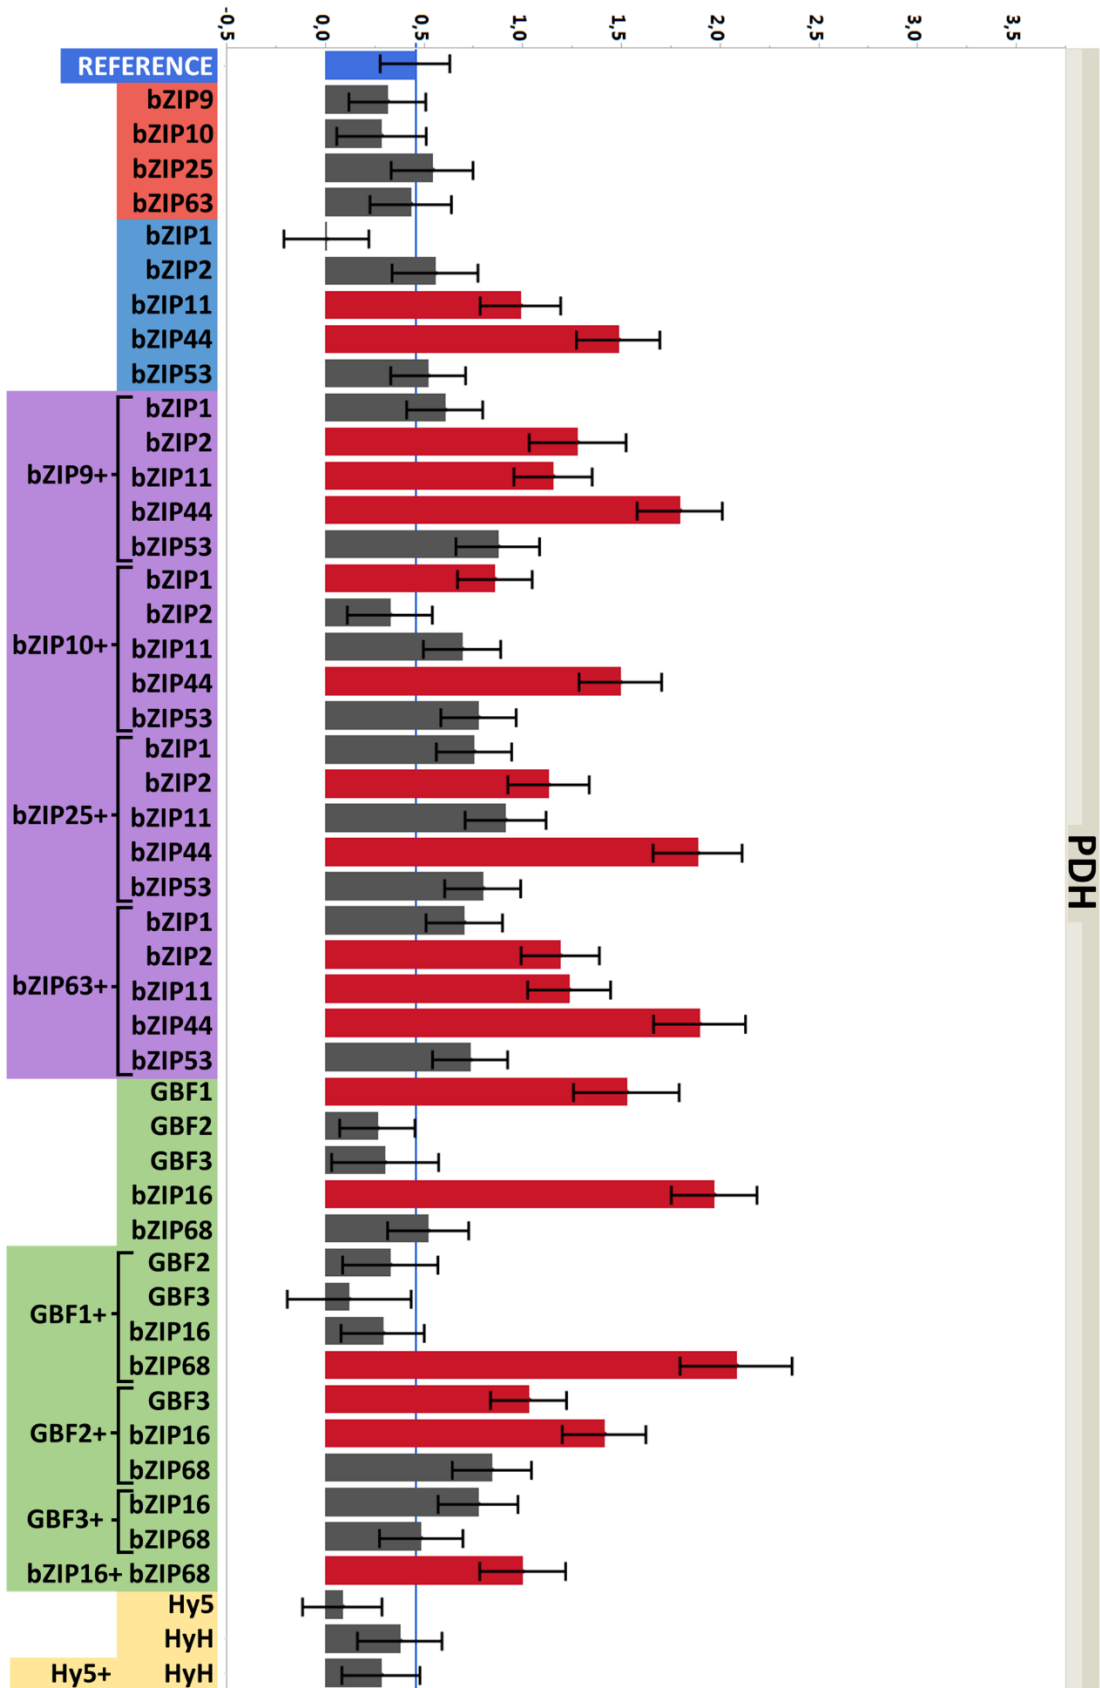

PDH

# GUS/LUC

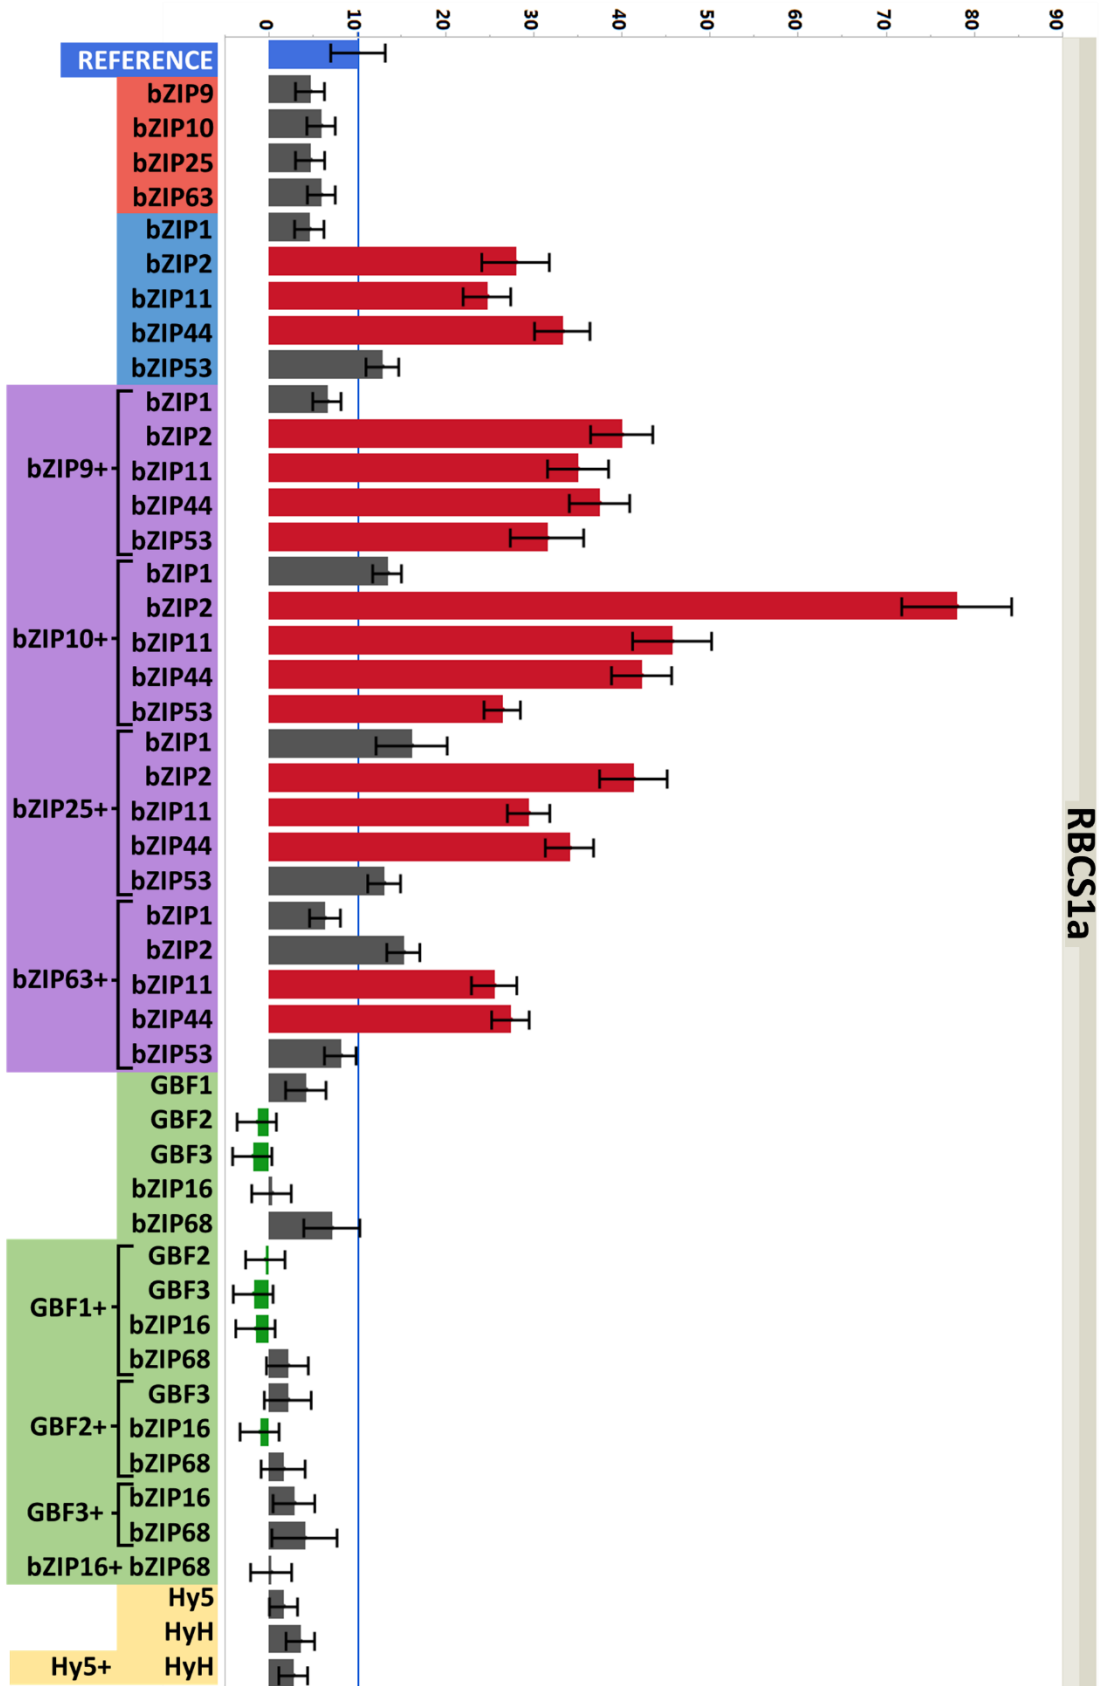

Supplement: pone.0139884.s003.pdf [file pone.0139884.s003.pdf]
