# Supplementary material for: The Elucidation of the Interactome of 16 Arabidopsis bZIP Factors Reveals Three Independent Functional Networks
Source: PubMed Central journal article supplement (PMC4599898; doi:10.1371/journal.pone.0139884), 2015-10-09
Supplement: pone.0139884.s009.pdf [file pone.0139884.s009.pdf]

**Estimates**  
**Adjustment for Multiplicity: Scheffe**

| <b>Comparisons</b> | <b>*Estimate</b> | <b>Standard Error</b> | <b>DF</b> | <b>t Value</b> | <b>Pr &gt;  t </b> | <b>Adj P</b> |
|--------------------|------------------|-----------------------|-----------|----------------|--------------------|--------------|
| <b>HH-GG</b>       | 0.5692           | 0.1106                | 873       | 5.15           | <.0001             | <.0001       |
| <b>HH-S1C</b>      | 1.8954           | 0.1287                | 873       | 14.73          | <.0001             | <.0001       |
| <b>HH-S1S1</b>     | 2.2750           | 0.1340                | 873       | 16.98          | <.0001             | <.0001       |
| <b>HH-CC</b>       | 2.6189           | 0.1506                | 873       | 17.39          | <.0001             | <.0001       |
| <b>HH-Rest</b>     | 3.2624           | 0.1086                | 873       | 30.04          | <.0001             | <.0001       |
| <b>GG-S1C</b>      | 1.3261           | 0.08236               | 873       | 16.10          | <.0001             | <.0001       |
| <b>GG-S1S1</b>     | 1.7058           | 0.09067               | 873       | 18.81          | <.0001             | <.0001       |
| <b>GG-CC</b>       | 2.0497           | 0.1131                | 873       | 18.13          | <.0001             | <.0001       |
| <b>GG-Rest</b>     | 2.6932           | 0.05274               | 873       | 51.07          | <.0001             | <.0001       |
| <b>S1C-S1S1</b>    | 0.2850           | 0.07586               | 873       | 3.76           | 0.0002             | 0.0002       |
| <b>S1C-CC</b>      | 0.7236           | 0.1005                | 873       | 7.20           | <.0001             | <.0001       |
| <b>S1C-Rest</b>    | 1.3670           | 0.07308               | 873       | 18.70          | <.0001             | <.0001       |
| <b>S1S1-CC</b>     | 0.3439           | 0.1065                | 873       | 3.23           | 0.0013             | 0.0025       |
| <b>S1S1-Rest</b>   | 0.9874           | 0.08224               | 873       | 12.01          | <.0001             | <.0001       |
| <b>CC-Rest</b>     | 0.6434           | 0.1063                | 873       | 6.05           | <.0001             | <.0001       |

\* estimates are on logit scale
